# Supplementary material
Source: PubMed Central journal article supplement (PMC2842009)
Supplement: NIHMS178525-supplement-1_si_001.pdf [file NIHMS178525-supplement-1_si_001.pdf]

**Supporting information for “Photo-crosslinked PDMS<sub>star</sub>-PEG Hydrogels: Synthesis, Characterization, and Potential Application for Tissue Engineering Scaffolds”**

*Yaping Hou,<sup>1</sup> Cody A. Schoener,<sup>1</sup> Katherine R. Regan,<sup>1</sup> Dany Munoz-Pinto,<sup>2</sup> Mariah S. Hahn,<sup>2</sup>*

*Melissa A. Grunlan<sup>1\*</sup>*

<sup>1</sup>Department of Biomedical Engineering, <sup>2</sup>Department of Chemical Engineering, Texas A&M University, College Station, TX 77843-3120

\*Corresponding author: Tel. 979-845-2406, E-mail: mgrunlan@tamu.edu

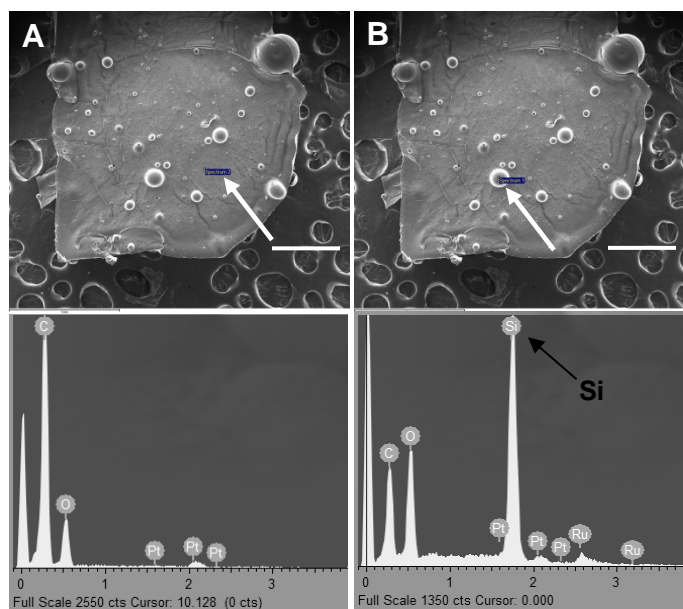

**S1.** SEM images and corresponding EDS spectra of **C<sub>20</sub>H<sub>80</sub>**: (A) bulk matrix (B) a microparticle. The presence of Si in the microparticle and not the surrounding area indicates that they are Si-enriched and formed from PDMS<sub>star</sub>-MA. (scale bar = 500  $\mu$ m)
